# Supplementary material for: The Mutation of the DNA-Binding Domain of Fur Protein Enhances the Pathogenicity of Edwardsiella piscicida via Inducing Overpowering Pyroptosis
Source: MDPI journal article supplement (doi:10.3390/microorganisms12010011), 2023-12-20
Supplement: s1 [file s1]

# The Mutation of the DNA-Binding Domain of Fur Protein Enhances the Pathogenicity of *Edwardsiella piscicida* via Inducing Overpowering Pyroptosis

Mimi Niu, Zhihai Sui, Guoquan Jiang, Ling Wang, Xuemei Yao, Yonghua Hu

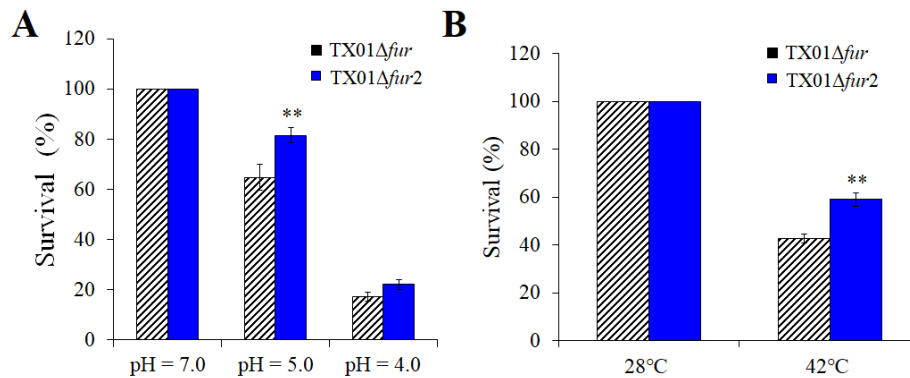

**Figure S1. Sensitivity of *Edwardsiella piscicida* to environmental stresses.** (A) TX01 $\Delta fur$  and TX01 $\Delta fur2$  were incubated in LB medium of pH 4.0, 5.0 and 7.0 for 4 h, respectively. The populations of survival bacteria were counted by diluted plate and the survival rate was calculated. (B) TX01 $\Delta fur$  and TX01 $\Delta fur2$  were incubated in LB medium for 4 h at 28 °C and 42 °C, respectively. After washing, the populations of survival bacteria were counted by diluted plate and the survival rate was calculated. Data are the means of three independent experiments and presented as mean  $\pm$  SEM. \*,  $P < 0.05$ ; \*\*,  $P < 0.01$ .

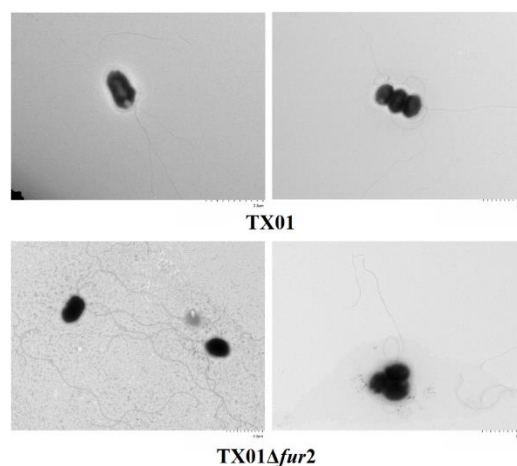

**Figure S2 The flagella observation by TEM.** TX01 and TX01 $\Delta fur2$  were cultured in LB solid medium. Bacteria were resuspended with PBS and stained by 1% phosphotungstic acid, flagella were observed using the TEM.
